# Supplementary material for: Novel low-carbon energy solutions for powering emerging wearables, smart textiles, and medical devices
Source: Royal Society of Chemistry journal article supplement (doi:10.1039/d2ee02695c), 2022-01-01
Supplement: d2ee02695c1.pdf [file d2ee02695c1.pdf]

## Supplementary Information

### **Novel Low-Carbon Energy Solutions for Powering Emerging Wearables, Smart Textiles, and Medical Devices - A Panoramic Review**

Brindha Ramasubramanian<sup>1,2</sup>, Subramanian Sundarrajan<sup>1</sup>, Rayavarapu Prasada Rao<sup>1</sup>, M.V. Reddy<sup>3</sup>, Vijila Chellappan<sup>2\*</sup>, Seeram Ramakrishna<sup>1\*</sup>

<sup>\*1</sup>Center for Nanofibers and Nanotechnology, Department of Mechanical Engineering, National University of Singapore, Singapore 117576, Singapore

<sup>\*2</sup>Institute of Materials Research and Engineering (IMRE), Agency for Science, Technology and Research (A\*STAR), #08-03, 2 Fusionopolis Way, Innovis, Singapore, 138634 Singapore

<sup>3</sup>Nouveau Monde Graphite, 481 Rue Brassard, Saint-Michel-de-Saints, QC J0K 3B0, Canada

Corresponding author: Seeram Ramakrishna ([seeram@nus.edu.sg](mailto:seeram@nus.edu.sg)), Vijila Chellappan ([c-vijila@imre.a-star.edu.sg](mailto:c-vijila@imre.a-star.edu.sg))

World Primary Energy Consumption (2020 - 2050) reported by EIA, October 2021

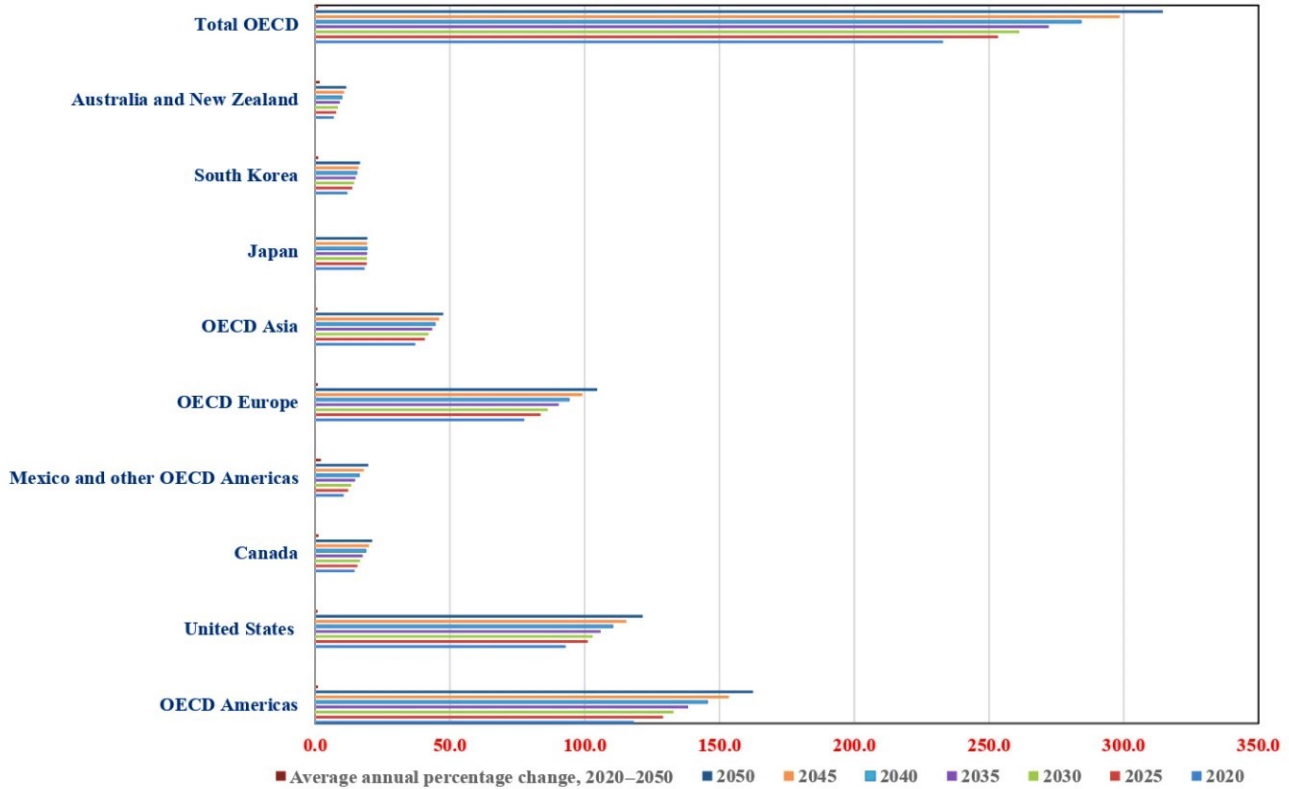

**Fig. 1** Global energy consumption (2020 to 2050), reported by EIA, 2021. (Datasets obtained from EIA, Outlook, October, 2021, © EIA).

World Primary Energy Consumption (2020 - 2050), reported by EIA, Non-OECD

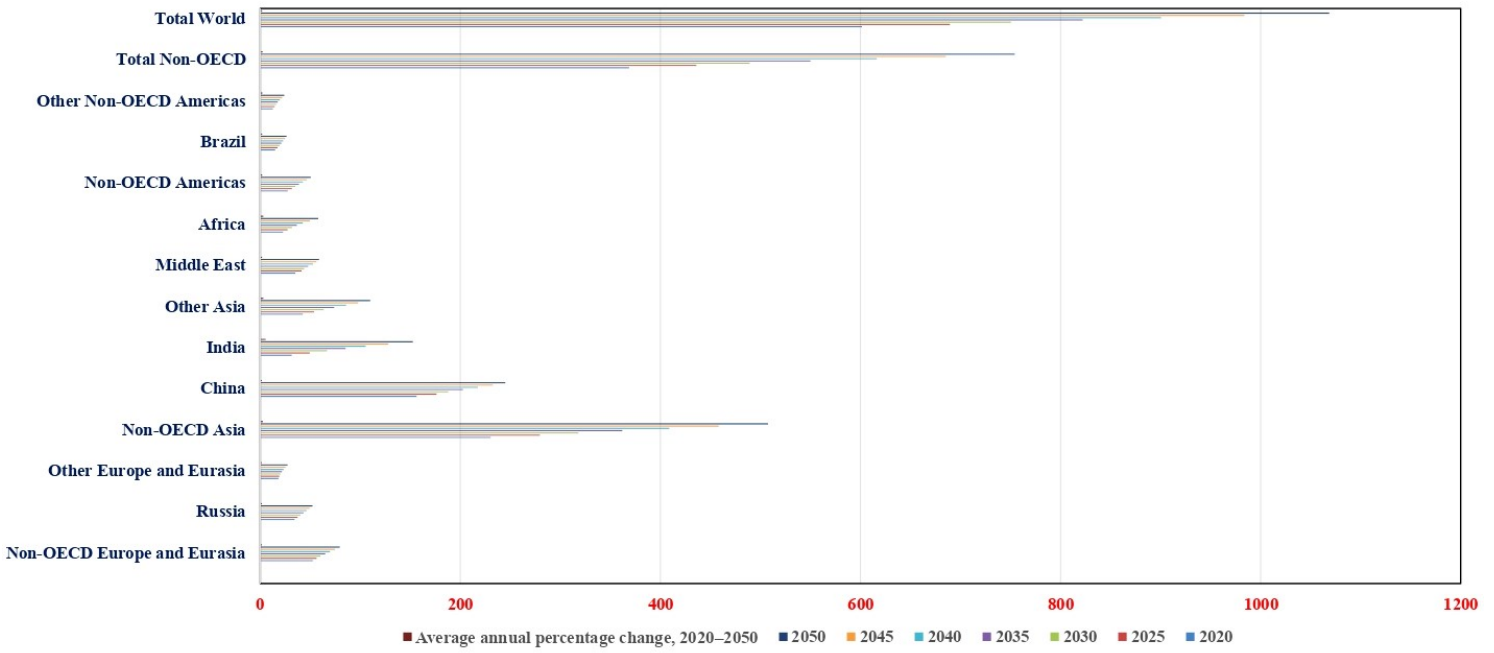

**Fig. 2** Energy consumption of non-OECD countries, 2020 – 2050, reported by EIA, 2021. (OECD: Organisation for Economic Co-operation and Development, datasets obtained from EIA, Outlook, 2021, © EIA)

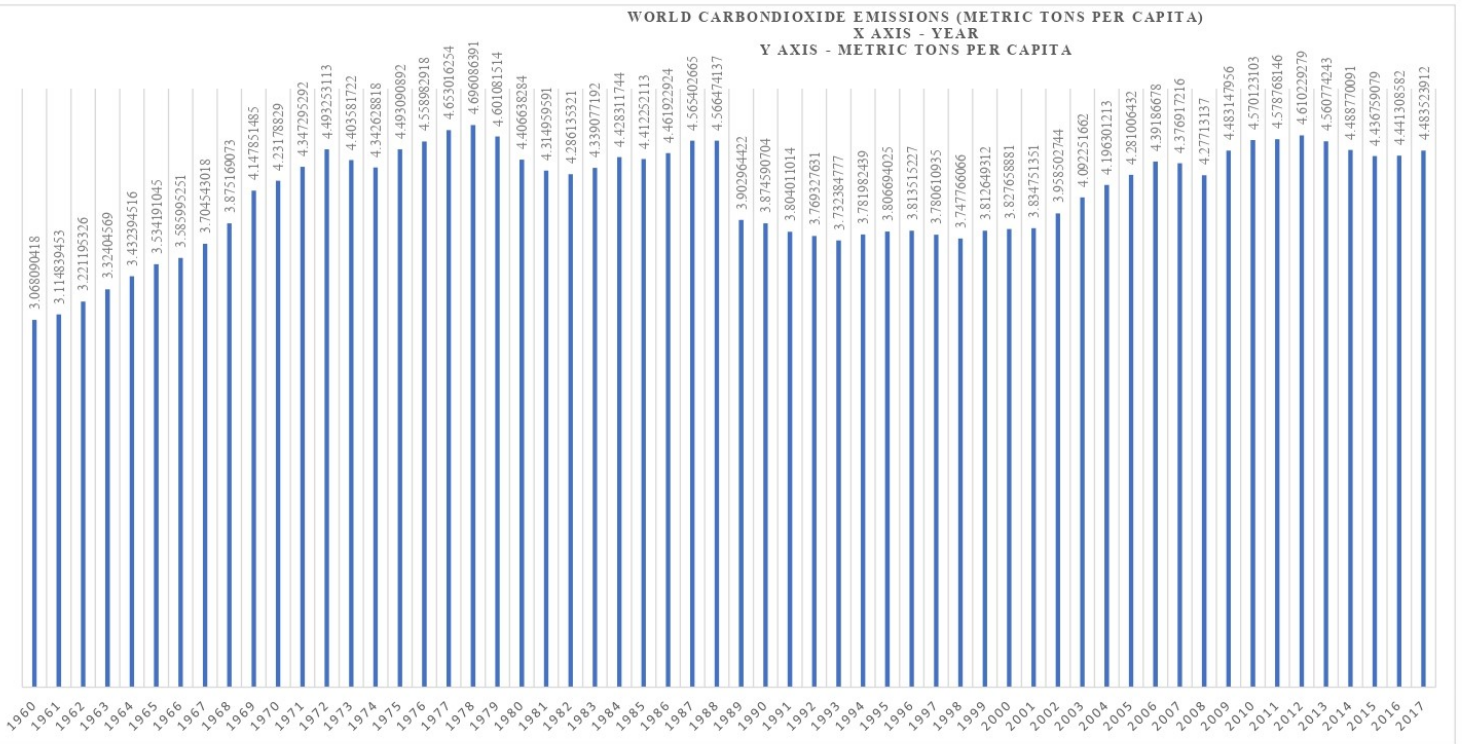

**Fig. 3** Global Annual CO2 emission in metric tons per capita, from 1960 to 2017 (datasets obtained from IEA, 2018).

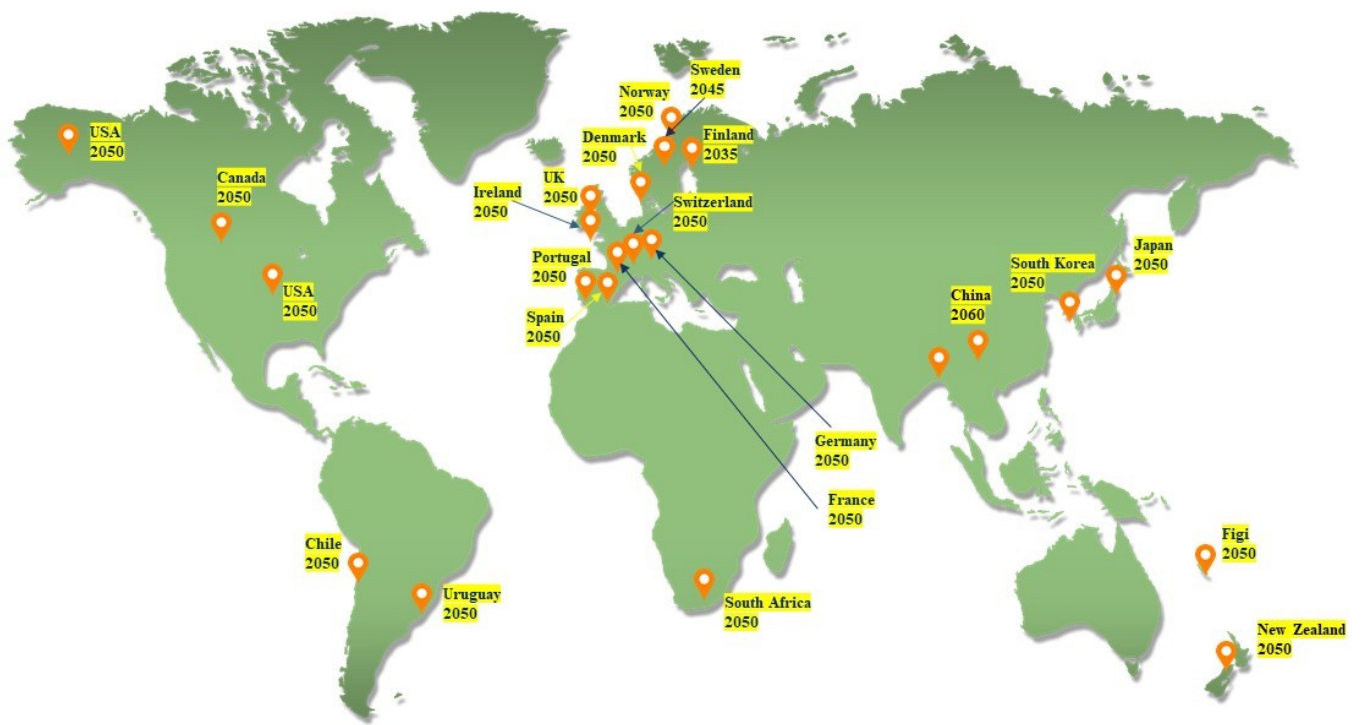

**Fig. 4** Zero carbon emission targets for committed countries, according to UN Climate Action Summit, 2019.

**Table S1** Recent design structure, Jsc, Voc, FF, PCE of solar cells

| Component            | Device structure                                                                                                                                              | Jsc<br>(mA<br>cm <sup>-2</sup> ) | Voc<br>(V) | FF   | PCE<br>(%) | Ref |
|----------------------|---------------------------------------------------------------------------------------------------------------------------------------------------------------|----------------------------------|------------|------|------------|-----|
| <b>Graphene</b>      |                                                                                                                                                               |                                  |            |      |            |     |
| Anode                | FTO/c-TiO <sub>2</sub> /MAPbI <sub>3-x</sub> Cl <sub>x</sub> /spiro-OMeTAD/PEDOT:PSS/GR(PDMS/PMMA/GR film)                                                    | 17.7                             | 0.94       | 0.72 | 12         | 1   |
| Anode                | GR/MoO <sub>3</sub> /PEDOT:PSS/MAPbI <sub>3</sub> /C <sub>60</sub> /BCP/LiF/Al                                                                                | 21.1                             | 1.03       | 0.72 | 16.1       | 2   |
| Anode                | GR/c-TiO <sub>2</sub> /mp-TiO <sub>2</sub> /MAPbI <sub>3-x</sub> Cl <sub>x</sub> /spiro-OMeTAD/Au                                                             | 2.55                             | 0.69       | 0.35 | 0.62       | 3   |
| Anode                | PEN/GR/MoO <sub>3</sub> /PEDOT:PSS/MAPbI <sub>3</sub> /C <sub>60</sub> /BCP/LiF/Al                                                                            | 21.7                             | 1          | 0.78 | 16.8       | 4   |
| Interfacial layer    | FTO/c-TiO <sub>2</sub> /GRflakes+mp-TiO <sub>2</sub> /GO-Li/MAPbI <sub>3</sub> /spiro-OMeTAD/Au                                                               |                                  | 8.57       | 0.65 | 12.6       | 5   |
| EDS layer            | N-GQD EDS/FTO/TiO <sub>2</sub> /γ-CsPbI <sub>3</sub> /PTAA/Au                                                                                                 | 19.2                             | 1.11       | 0.76 | 16.2       | 6   |
| ESL                  | ITO/PEDOT:PSS/MAPbI <sub>3</sub> /PCBM/GNPs/Al                                                                                                                | 18.5                             | 0.98       | 0.78 | 14.3       | 7   |
| In ESL               | FTO/c-TiO <sub>2</sub> /mp-GR/SrTiO <sub>3</sub> /MAPbI <sub>3</sub> /spiro-MeOTAD/Ag                                                                         | 20                               | 1.03       | 0.72 | 14.5       | 8   |
| In ESL               | ITO/SnO <sub>2</sub> :NDI-GR/FA <sub>0.75</sub> MA <sub>0.15</sub> Cs <sub>0.1</sub> PbI <sub>2.65</sub> Br <sub>0.35</sub> /spiro-OMeTAD/Au                  | 22.7                             | 1.08       | 0.82 | 20.2       | 9   |
| Electrode and in ESL | GR/PCBM:GQDs/MAPbI <sub>3</sub> /PTAA/Au                                                                                                                      | 20.8                             | 1.07       | 0.74 | 16.4       | 10  |
| ESL                  | FTO/GQD@SnO <sub>2</sub> /Cs <sub>0.05</sub> ((FAPbI <sub>3</sub> ) <sub>0.83</sub> (MAPbBr <sub>3</sub> ) <sub>0.17</sub> ) <sub>0.95</sub> /spiro-OMeTAD/Au | 23.5                             | 1.08       | 0.77 | 19.6       | 11  |

|                               |                                                                                                                                                            |      |      |      |       |    |
|-------------------------------|------------------------------------------------------------------------------------------------------------------------------------------------------------|------|------|------|-------|----|
| ESL                           | FTO/ZnO/GR/LHP/spiro-OMeTAD/Au                                                                                                                             | 22.7 | 1.12 | 0.78 | 19.8  | 12 |
| ESL                           | FTO/c-TiO <sub>2</sub> :GNRs/mp-TiO <sub>2</sub> :GNRs/MAPbI <sub>3</sub> /spiro-OMeTAD/Ag                                                                 | 23   | 1.05 | 0.73 | 17.7  | 13 |
| <b>Graphene oxide</b>         |                                                                                                                                                            |      |      |      |       |    |
| In HSL                        | ITO/PEDOT:PSS:AgOTf-doped GO/MAPbI <sub>3</sub> - <sub>x</sub> Cl <sub>x</sub> /PCBM/Au                                                                    | 19.2 | 0.88 | 0.71 | 11.9  | 14 |
| HSL                           | ITO/ammonia-treated GO/MAPbI <sub>3</sub> - <sub>x</sub> Cl <sub>x</sub> /PC <sub>61</sub> BM/Ag                                                           | 18.4 | 1.00 | 0.77 | 14.14 | 15 |
| Interlayer                    | FTO/c-TiO <sub>2</sub> /mp-TiO <sub>2</sub> /GO-Li/MAPbI <sub>3</sub> /spiro-OMeTAD/Au                                                                     | 19.6 | 0.86 | 0.70 | 11.8  | 16 |
| In LHP                        | FTO/spiro-bifluorene/GO-MAPbI <sub>3</sub> /PC <sub>61</sub> BM/Au                                                                                         | 18.8 | 1.07 | 0.71 | 14.3  | 17 |
| HSL                           | ITO/GO/MAPbI <sub>3</sub> - <sub>x</sub> Cl <sub>x</sub> /PCBM/ZnO/Al                                                                                      | 17.5 | 1    | 0.71 | 12.4  | 18 |
| HSL                           | ITO/GO/MAPbI <sub>3</sub> - <sub>x</sub> Cl <sub>x</sub> /PCBM/BCP/LiF/Al                                                                                  | 14.5 | 0.92 | 0.72 | 9.6   | 19 |
| In LHP                        | ITO/GO/MAPbI <sub>3</sub> :GO/PCBM/Ag                                                                                                                      | 20.7 | 0.93 | 0.65 | 15.2  | 20 |
| Interfacial layer             | ITO/PEDOT:PSS-GO:NH <sub>3</sub> /MAPbI <sub>3</sub> - <sub>x</sub> Cl <sub>x</sub> /PC <sub>61</sub> BM/Bphen/Ag                                          | 21.7 | 1.03 | 0.70 | 16.1  | 21 |
| Interfacial layer             | FTO/c-TiO <sub>2</sub> /mp-TiO <sub>2</sub> /MAPbI <sub>3</sub> - <sub>x</sub> Cl <sub>x</sub> /GO/P3HT/Au                                                 | 24.4 | 0.93 | 0.58 | 13.2  | 22 |
| <b>Reduced graphene oxide</b> |                                                                                                                                                            |      |      |      |       |    |
| Interfacial layer             | FTO/c-TiO <sub>2</sub> /mp-TiO <sub>2</sub> /FAMACsPbI <sub>3</sub> - <sub>x</sub> Br <sub>x</sub> /CuSCN/RGO/Au                                           | 23.2 | 1.11 | 0.78 | 20.4  | 23 |
| In ESL                        | FTO/c-TiO <sub>2</sub> /RGO-mp-TiO <sub>2</sub> nanocomposite/MAPbI <sub>3</sub> /spiro-OMeTAD/Ag                                                          | 22   | 0.93 | 0.71 | 14.5  | 24 |
| In ESL                        | FTO/ZnO-RGO/MAPbI <sub>3</sub> /spiro-OMeTAD/Au                                                                                                            | 21.7 | 1.03 | 0.68 | 15.2  | 25 |
| In ESL                        | FTO/c-TiO <sub>2</sub> /mp-TiO <sub>2</sub> :RGO(Li treated)/(FAPbI <sub>3</sub> ) <sub>0.85</sub> (MAPbBr <sub>3</sub> ) <sub>0.15</sub> /spiro-OMeTAD/Au | 22   | 1.11 | 0.80 | 19.5  | 26 |

|                                  |                                                                                                                                                                                         |      |      |       |      |    |
|----------------------------------|-----------------------------------------------------------------------------------------------------------------------------------------------------------------------------------------|------|------|-------|------|----|
| In ESL,LHP and HSL               | FTO/RGO-TiO <sub>2</sub> /RGO-MAPbI <sub>3</sub> /RGO-spiro-MeOTAD/Ag                                                                                                                   | 22.9 | 1.00 | 0.72  | 16.5 | 27 |
| ESL                              | FTO/c-TiO <sub>2</sub> :RGO/mp-TiO <sub>2</sub> :RGO/MAPbI <sub>3</sub> /spiro-MeOTAD/Au                                                                                                | 16.5 | 0.84 | 0.68  | 9.3  | 28 |
| In LHP                           | FTO/c-TiO <sub>2</sub> /mp-TiO <sub>2</sub> /(FAPbI <sub>3</sub> ) <sub>0.85</sub> (MAPbBr <sub>3</sub> ) <sub>0.15</sub> :N-RGO/spiro-OMeTAD/Au                                        | 21.8 | 1.15 | 0.74  | 18.7 | 29 |
| In LHP                           | FTO)/SnO <sub>x</sub> /((Cs <sub>0.05</sub> (FA <sub>0.85</sub> MA <sub>0.15</sub> ) <sub>0.95</sub> Pb(I <sub>0.85</sub> Br <sub>0.15</sub> ) <sub>3</sub> :oxo-RGO/DA/spiro-OMeTAD/Au | 23.1 | 1.13 | 0.81  | 21.1 | 30 |
| HSL and anode                    | FTO/c-TiO <sub>2</sub> /mp-TiO <sub>2</sub> /MAPbI <sub>3</sub> /RGO                                                                                                                    | 16.7 | 0.94 | 0.73  | 11.5 | 31 |
| HSL                              | ITO/RGO/MAPbI <sub>3</sub> /PC <sub>61</sub> BM/BCP/Ag                                                                                                                                  | 14.8 | 0.95 | 0.71  | 10.8 | 32 |
| Interfacial layer                | ITO/c-TiO <sub>2</sub> /MAPbI <sub>3</sub> Cl <sub>3-x</sub> /RGO/spiro-OMeTAD/Au                                                                                                       | 21.5 | 1.11 | 0.78  | 18.8 | 33 |
| In HSL                           | FTO/TiO <sub>2</sub> /MAPbI <sub>3</sub> /spiro-OMeTAD/RGO/Au                                                                                                                           | 16.7 | 0.91 | 0.006 | 10.6 | 34 |
| HSL                              | ITO/RGO/MAPbI <sub>3</sub> /PCBM/Ag                                                                                                                                                     | 21.3 | 0.96 | 0.79  | 16   | 35 |
| Transparent electrode            | RGO/c-TiO <sub>2</sub> +GR/mp-TiO <sub>2</sub> +GR/MAPbI <sub>3</sub> -xCl <sub>x</sub> /spiro-OMeTAD/Au                                                                                | 2.9  | 0.69 | 0.38  | 0.81 | 36 |
| <b>CNT</b>                       |                                                                                                                                                                                         |      |      |       |      |    |
|                                  | SWCNTs/PEDOT:PSS/MoO <sub>3</sub> /MAPbI <sub>3</sub> /C <sub>60</sub> /B CP/Al                                                                                                         | 19.9 | 0.98 | 0.78  | 15.3 | 37 |
|                                  | SWCNTs/MoO <sub>3</sub> /PEDOT:PSS/MAPbI <sub>3</sub> /C <sub>60</sub> /B CP/Al                                                                                                         | 17.5 | 0.96 | 0.76  | 12.8 | 37 |
| Transparent conductive electrode | SWCNTs/PEDOT:PSS/MAPbI <sub>3</sub> /PCBM/Al                                                                                                                                            | 14.9 | 0.79 | 0.54  | 6.3  | 38 |
|                                  | DWCNTs/PTAA/MA <sub>0.6</sub> FA <sub>0.4</sub> PbI <sub>2.9</sub> Br <sub>0.1</sub> /C <sub>60</sub> /B CP/Cu                                                                          | 21.4 | 1.05 | 0.77  | 17.2 | 39 |
|                                  | CNTS-PEDOT:PSS/ZnO/MAPbI <sub>3</sub> /spiro-OMeTAD/MoO <sub>3</sub> /Ag                                                                                                                | 19.4 | 1.07 | 0.64  | 13.3 | 40 |
|                                  | SWCNTs/PEDOT:PSS/MAPbI <sub>3</sub> /PCBM/Al                                                                                                                                            | 18.3 | 0.81 | 0.66  | 9.8  | 41 |

|                          |                                                                                                                                                                                                                 |      |      |      |      |    |
|--------------------------|-----------------------------------------------------------------------------------------------------------------------------------------------------------------------------------------------------------------|------|------|------|------|----|
| Electron transport layer | FTO/c-TiO <sub>2</sub> /SWCNTs-m-TiO <sub>2</sub> /MAPbI <sub>3</sub> /spiro-OMeTAD/Au                                                                                                                          | 21.4 | 0.98 | 0.78 | 15.3 | 42 |
|                          | FTO/c-TiO <sub>2</sub> /SWCNTs-m-TiO <sub>2</sub> /MAPbI <sub>3</sub> /spiro-OMeTAD/Au                                                                                                                          | 21.9 | 1.04 | 0.70 | 16.1 | 43 |
|                          | FTO/c-TiO <sub>2</sub> /SWCNTs-m-TiO <sub>2</sub> /MAPbI <sub>3</sub> /spiro-OMeTAD/Au                                                                                                                          | 24.5 | 1.08 | 0.73 | 19.3 | 44 |
|                          | FTO/c-TiO <sub>2</sub> /SWCNTs-m-TiO <sub>2</sub> /MAPbI <sub>3</sub> /PTAA/Au                                                                                                                                  | 23.6 | 1.1  | 0.79 | 20.4 | 45 |
|                          | FTO/c-TiO <sub>2</sub> /MWCNTs-m-TiO <sub>2</sub> /MAPbI <sub>3</sub> /spiro-OMeTAD/Au                                                                                                                          | 27.9 | 1.08 | 0.73 | 21.7 | 46 |
|                          | FTO/c-TiO <sub>2</sub> /MWCNTs-Graphene-m-TiO <sub>2</sub> /Cs <sub>0.05</sub> (FA <sub>0.83</sub> MA <sub>0.17</sub> ) <sub>0.95</sub> Pb(I <sub>0.83</sub> Br <sub>0.17</sub> ) <sub>3</sub> /spiro-OMeTAD/Au | 24.8 | 0.90 | 0.62 | 13.9 | 47 |
|                          | ITO/CNTs-SnO <sub>2</sub> /MAPbI <sub>3</sub> /spiro-OMeTAD/Au                                                                                                                                                  | 23.2 | 1.12 | 0.78 | 20.3 | 48 |
| Perovskite layer         | ITO/PTAA/MAPbI <sub>3</sub> /CNTs-PCBM/Ag                                                                                                                                                                       | 23.5 | 1.04 | 0.78 | 19.3 | 49 |
|                          | ITO/SnO <sub>2</sub> /MAPbI <sub>3</sub> +SWCNTs/spiro-OMeTAD/Au                                                                                                                                                | 23.7 | 1.14 | 0.72 | 19.5 | 50 |
|                          | FTO/c-TiO <sub>2</sub> /m-TiO <sub>2</sub> /MAPbI <sub>3</sub> +MWCNTs/spiro-OMeTAD/Au/                                                                                                                         | 20.8 | 0.97 | 0.75 | 15.1 | 51 |
|                          | FTO/c-TiO <sub>2</sub> /m-TiO <sub>2</sub> /MAPbI <sub>3</sub> +MWCNTs/spiro-OMeTAD/Au/                                                                                                                         | 23.6 | 0.97 | 0.76 | 17.4 | 52 |
|                          | ITO/PEDOT:PSS/MA <sub>x</sub> FA <sub>1-x</sub> PbI <sub>3</sub> +MWCNTs/PCBM/Ca/Al                                                                                                                             | 18.2 | 0.97 | 0.72 | 12.9 | 53 |
|                          | ITO/SnO <sub>2</sub> /MAPbI <sub>3</sub> +s-SWCNTs/spiro-OMeTAD/Au                                                                                                                                              | 24.0 | 1.09 | 0.79 | 20.7 | 54 |
|                          | FTO/c-TiO <sub>2</sub> /SnO <sub>2</sub> /MA <sub>0.85</sub> FA <sub>0.15</sub> PbI <sub>3</sub> +CNTs/spiro-OMeTAD/Ag                                                                                          | 23.5 | 1.09 | 0.82 | 21.0 | 55 |



|                      |                                                                                                                                                                                  |      |      |      |      |    |
|----------------------|----------------------------------------------------------------------------------------------------------------------------------------------------------------------------------|------|------|------|------|----|
|                      | FTO/c-TiO <sub>2</sub> /SiO <sub>2</sub> /MAPbI <sub>3</sub> +MWCNTs/Carbon                                                                                                      | 21.3 | 0.92 | 0.59 | 11.6 | 56 |
|                      | FTO/SnO <sub>2</sub> /(FA <sub>0.83</sub> MA <sub>0.17</sub> ) <sub>0.95</sub> Cs <sub>0.05</sub> Pb(I <sub>0.83</sub> Br <sub>0.17</sub> ) <sub>3</sub> +SWCNTs/spiro-OMeTAD/Au | 20.7 | 1.13 | 0.69 | 16.1 | 57 |
| Hole transport layer | FTO/c-TiO <sub>2</sub> /Al <sub>2</sub> O <sub>3</sub> /MAPbI <sub>x</sub> Cl <sub>3-x</sub> /SWCNTs/PMMA/Ag                                                                     | 17.7 | 0.97 | 0.60 | 10.6 | 58 |
|                      | FTO/c-TiO <sub>2</sub> /Al <sub>2</sub> O <sub>3</sub> /MAPbI <sub>x</sub> Cl <sub>3-x</sub> /P3HT/SWCNTs-spiro-OMeTAD/Ag                                                        | 21.4 | 1.02 | 0.71 | 15.4 | 59 |
|                      | FTO/c-TiO <sub>2</sub> /m-TiO <sub>2</sub> /MAPbI <sub>3</sub> /SWCNTs-GO/PMMA/Au                                                                                                | 20.1 | 0.95 | 0.61 | 11.7 | 60 |
|                      | FTO/c-TiO <sub>2</sub> /m-TiO <sub>2</sub> /MAPbBr <sub>3</sub> /CNTs-PMMA/Au                                                                                                    | 5.8  | 1.31 | 0.75 | 5.8  | 61 |
|                      | FTO/SnO <sub>2</sub> /FA <sub>0.83</sub> Cs <sub>0.17</sub> Pb(I <sub>0.83</sub> Br <sub>0.17</sub> ) <sub>3</sub> /SWCNTs-spiro-OMeTAD/Ag                                       | 22.4 | 1.10 | 0.69 | 16.8 | 62 |
|                      | FTO/SnO <sub>2</sub> /FA <sub>0.83</sub> Cs <sub>0.17</sub> Pb(I <sub>0.83</sub> Br <sub>0.17</sub> ) <sub>3</sub> /MWCNTs-spiro-OMeTAD/Ag                                       | 22.0 | 1.07 | 0.72 | 17.1 | 62 |
|                      | FTO/SnO <sub>2</sub> /(FA <sub>0.83</sub> MA <sub>0.17</sub> Pb(I <sub>0.83</sub> Br <sub>0.17</sub> ) <sub>3</sub> /SWCNTs-PMMA/Ag                                              | 22.4 | 1.05 | 0.74 | 17.4 | 63 |
|                      | FTO/SnO <sub>2</sub> /(FA <sub>0.83</sub> MA <sub>0.17</sub> Pb(I <sub>0.83</sub> Br <sub>0.17</sub> ) <sub>3</sub> /SWCNTs-spiro-OMeTAD/Ag                                      | 22.1 | 1.23 | 0.77 | 20.9 | 63 |
|                      | FTO/c-TiO <sub>2</sub> /MAPbI <sub>3</sub> /spiro-OMeTAD/MWCNTs-spiro-OMeTAD/Au                                                                                                  | 21.6 | 1.13 | 0.69 | 15.1 | 64 |
|                      | FTO/c-TiO <sub>2</sub> /m-TiO <sub>2</sub> /MAPbI <sub>3</sub> /CNTs-P3HT/Au                                                                                                     | 18.7 | 0.86 | 0.52 | 8.3  | 65 |
|                      | FTO/c-TiO <sub>2</sub> /m-TiO <sub>2</sub> /CsPbI <sub>2</sub> Br/MWCNTs-P3HT/carbon                                                                                             | 13.3 | 1.21 | 0.62 | 10.1 | 66 |
|                      | ITO/SWCNTs-PEDOT:PSS/MAPbI <sub>3</sub> /PCBM/Ag                                                                                                                                 | 18.0 | 0.98 | 0.71 | 12.5 | 67 |
|                      | ITO/SWCNTs-PEDOT:PSS/MAPbI <sub>3</sub> /PCBM/Ag                                                                                                                                 | 20.3 | 1.04 | 0.75 | 16.0 | 68 |

|                |                                                                                                                                                                                                   |      |      |      |      |    |
|----------------|---------------------------------------------------------------------------------------------------------------------------------------------------------------------------------------------------|------|------|------|------|----|
|                | ITO/s-SWCNTs-NiO <sub>x</sub> /MAPbI <sub>3</sub> /PCBM/Ag                                                                                                                                        | 22.0 | 1.01 | 0.73 | 16.9 | 69 |
|                | FTO/c-TiO <sub>2</sub> /m-TiO <sub>2</sub> /MAPbI <sub>3</sub> /SWCNTs-C <sub>2</sub> uZnSnS <sub>4</sub> /Au                                                                                     | 20.5 | 1.05 | 0.70 | 15.2 | 70 |
|                | FTO/c-TiO <sub>2</sub> /MAPbI <sub>3</sub> /SWCNTs-spiro-OMeTAD/Ag                                                                                                                                | 20.8 | 1.07 | 0.73 | 16.1 | 71 |
|                | FTO/c-TiO <sub>2</sub> /m-TiO <sub>2</sub> /SWCNTs/MAPbI <sub>x</sub> Cl <sub>3-x</sub> /P3HT/Au                                                                                                  | 22.8 | 0.85 | 0.70 | 13.6 | 72 |
| Interlayer     | FTO/c-TiO <sub>2</sub> /MAPbI <sub>3</sub> /SWCNTs/spiro-OMeTAD/Ag                                                                                                                                | 20.8 | 1.07 | 0.73 | 16.1 | 71 |
|                | FTO/c-TiO <sub>2</sub> /m-TiO <sub>2</sub> /CsPbI <sub>3</sub> /CNTs/Carbon                                                                                                                       | 18.6 | 0.80 | 0.71 | 10.6 | 73 |
|                | FTO/c-TiO <sub>2</sub> /m-TiO <sub>2</sub> /MAPbI <sub>3</sub> /NiO/MWCNTs                                                                                                                        | 22.8 | 0.91 | 0.76 | 15.8 | 74 |
|                | FTO/c-TiO <sub>2</sub> /m-TiO <sub>2</sub> /MAPbI <sub>3</sub> /CuSCN/MWCNTs                                                                                                                      | 23.7 | 1.10 | 0.73 | 17.5 | 75 |
|                | FTO/c-TiO <sub>2</sub> /m-TiO <sub>2</sub> /Al <sub>2</sub> O <sub>3</sub> /SWCNTs-NiO (MAPbI <sub>3</sub> )                                                                                      | 20.7 | 0.94 | 0.64 | 12.7 | 76 |
|                | FTO/c-TiO <sub>2</sub> /m-TiO <sub>2</sub> /MAPbI <sub>3</sub> /MWCNTs-P3HT                                                                                                                       | 22.7 | 0.91 | 0.65 | 13.4 | 77 |
|                | FTO/c-TiO <sub>2</sub> /m-TiO <sub>2</sub> /Cs <sub>0.5</sub> (MA <sub>0.1</sub> FA <sub>0.83</sub> ) <sub>0.95</sub> Pb(I <sub>0.83</sub> Br <sub>0.17</sub> ) <sub>3</sub> /SWCNTs-spiro-OMeTAD | 21.0 | 1.12 | 0.71 | 16.6 | 78 |
| Back electrode | ITO/C <sub>60</sub> /MAPbI <sub>3</sub> /SWCNTs-P3HT                                                                                                                                              | 21.7 | 0.94 | 0.67 | 13.6 | 79 |
|                | ITO/C <sub>60</sub> /MAPbI <sub>3</sub> /SWCNTs-PTAA                                                                                                                                              | 23.0 | 0.98 | 0.68 | 15.3 | 79 |
|                | ITO/C <sub>60</sub> /MAPbI <sub>3</sub> /SWCNTs-spiro-OMeTAD                                                                                                                                      | 23.8 | 1.08 | 0.66 | 17.0 | 79 |
|                | ITO/SnO <sub>2</sub> /MAPbI <sub>3</sub> /SWCNTs-MoS <sub>2</sub> -spiro-MeOTAD                                                                                                                   | 23.8 | 1.00 | 0.63 | 15.0 | 80 |
|                | ITO/SnO <sub>2</sub> /FA <sub>x</sub> Cs <sub>1-x</sub> PbI <sub>3</sub> /SWCNTs-spiro-MeOTAD                                                                                                     | 24.2 | 1.00 | 0.72 | 17.5 | 81 |
|                | ITO/SnO <sub>2</sub> /MAPbI <sub>3</sub> /CNTs-spiro-MeOTAD                                                                                                                                       | 22.7 | 1.12 | 0.73 | 18.8 | 82 |

|                  |                                                                                                |      |      |      |      |    |
|------------------|------------------------------------------------------------------------------------------------|------|------|------|------|----|
|                  | ITO/PEDOT:PSS/MAPbI <sub>3</sub> /PCBM/SWCNTs                                                  | 18.1 | 0.79 | 0.73 | 11.0 | 83 |
|                  | SWCNTs/PEDOT:PSS/MAPbI <sub>3</sub> /SWCNTs-PCBM                                               | 15.9 | 0.80 | 0.57 | 7.3  | 83 |
|                  | PET/SWCNTs-MoO <sub>3</sub> /PEDOT:PSS/MAPbI <sub>3</sub> /C <sub>60</sub> /BCP/Al             | 18.8 | 0.90 | 0.65 | 11.0 | 84 |
|                  | Ti/TiO <sub>2</sub> /MAPbI <sub>3</sub> /CNTs-spiro-OMeTAD                                     | 14.3 | 0.99 | 0.68 | 8.3  | 85 |
|                  | PET/SWCNTs-P3HT/PEDOT:PSS/MAPbI <sub>3</sub> /SWCNTs-PCBM                                      | 16.0 | 0.79 | 0.56 | 7.1  | 86 |
| 2D flexible PSCs | PET/SWCNTs/PEDOT:PSS/MAPbI <sub>3</sub> /PCBM/Al                                               | 16.4 | 0.80 | 0.55 | 7.2  | 86 |
|                  | PEN/ITO/NiO/Al <sub>2</sub> O <sub>3</sub> /SnO <sub>2</sub> @MWCNTs(MAPbI <sub>3</sub> )      | 19.2 | 0.91 | 0.60 | 10.5 | 87 |
|                  | PET/graphene/TiO <sub>2</sub> /PCBM/MAPbI <sub>3</sub> /MWCNTs-spiro-OMeTAD                    | 20.2 | 0.89 | 0.65 | 11.9 | 88 |
|                  | PET/graphene/TiO <sub>2</sub> /PCBM/MAPbI <sub>3</sub> /MWCNTs                                 | 18.9 | 0.82 | 0.53 | 8.4  | 88 |
| 1D flexible PSCs | Stainless steel/c-TiO <sub>2</sub> /m-TiO <sub>2</sub> /MAPbI <sub>3</sub> /spirom-OmeTAD/CNTs | 10.2 | 0.66 | 0.48 | 3.3  | 89 |
|                  | Ti/TiO <sub>2</sub> /MAPbI <sub>3</sub> /CNTs                                                  | 14.5 | 0.87 | 0.56 | 7.1  | 90 |
|                  | PEN/ITO/c-TiO <sub>2</sub> /MAPbI <sub>3</sub> /CNTs                                           | 15.9 | 0.91 | 0.65 | 9.4  | 91 |
|                  | CNTs/c-TiO <sub>2</sub> /m-TiO <sub>2</sub> /MAPbI <sub>3</sub> /spirom-OmeTAD/CNTs            | 2.1  | 0.82 | 0.35 | 0.6  | 91 |
|                  | CNTs/c-TiO <sub>2</sub> /m-TiO <sub>2</sub> /MAPbI <sub>3</sub> -xCl <sub>x</sub> /SWCNTs/CNTs | 8.7  | 0.61 | 0.56 | 3.0  | 92 |

## References

- 1 P. You, Z. Liu, Q. Tai, S. Liu and F. Yan, *Advanced Materials*, 2015, **27**, 3632–3638.
- 2 H. Sung, N. Ahn, M. S. Jang, J. K. Lee, H. Yoon, N. G. Park and M. Choi, *Advanced Energy Materials*, 2016, **6**, 1501873.
- 3 M. Batmunkh, C. J. Shearer, M. J. Biggs and J. G. Shapter, *Journal of Materials Chemistry A*, 2016, **4**, 2605–2616.
- 4 J. Yoon, H. Sung, G. Lee, W. Cho, N. Ahn, H. S. Jung and M. Choi, *Energy & Environmental Science*, 2017, **10**, 337–345.
- 5 A. Agresti, S. Pescetelli, A. L. Palma, A. E. del Rio Castillo, D. Konios, G. Kakavelakis, S. Razza, L. Cinà, E. Kymakis, F. Bonaccorso and A. di Carlo, *ACS Energy Letters*, 2017, **2**, 279–287.
- 6 H. Bian, Q. Wang, S. Yang, C. Yan, H. Wang, L. Liang, Z. Jin, G. Wang and S. Liu, *Journal of Materials Chemistry A*, 2019, **7**, 5740–5747.
- 7 G. H. Kim, H. Jang, Y. J. Yoon, J. Jeong, S. Y. Park, B. Walker, I. Y. Jeon, Y. Jo, H. Yoon, M. Kim, J. B. Baek, D. S. Kim and J. Y. Kim, *Nano Letters*, 2017, **17**, 6385–6390.
- 8 C. Wang, Y. Tang, Y. Hu, L. Huang, J. Fu, J. Jin, W. Shi, L. Wang and W. Yang, *RSC Advances*, 2015, **5**, 52041–52047.
- 9 X. Zhao, L. Tao, H. Li, W. Huang, P. Sun, J. Liu, S. Liu, Q. Sun, Z. Cui, L. Sun, Y. Shen, Y. Yang and M. Wang, *Nano Letters*, 2018, **18**, 2442–2449.
- 10 D. H. Shin, J. M. Kim, S. H. Shin and S. H. Choi, *Dyes and Pigments*, 2019, **170**, 107630.
- 11 Y. Zhou, S. Yang, X. Yin, J. Han, M. Tai, X. Zhao, H. Chen, Y. Gu, N. Wang and H. Lin, *Journal of Materials Chemistry A*, 2019, **7**, 1878–1888.
- 12 M. M. Tavakoli, R. Tavakoli, P. Yadav and J. Kong, *Journal of Materials Chemistry A*, 2019, **7**, 679–686.
- 13 X. Meng, X. Cui, M. Rager, S. Zhang, Z. Wang, J. Yu, Y. W. Harn, Z. Kang, B. K. Wagner, Y. Liu, C. Yu, J. Qiu and Z. Lin, *Nano Energy*, 2018, **52**, 123–133.
- 14 T. Liu, D. Kim, H. Han, A. R. bin Mohd Yusoff and J. Jang, *Nanoscale*, 2015, **7**, 10708–10718.
- 15 Y. Wang, Y. Hu, D. Han, Q. Yuan, T. Cao, N. Chen, D. Zhou, H. Cong and L. Feng, *Organic Electronics*, 2019, **70**, 63–70.
- 16 A. Agresti, S. Pescetelli, L. Cinà, D. Konios, G. Kakavelakis, E. Kymakis and A. di Carlo, *Advanced Functional Materials*, 2016, **26**, 2686–2694.
- 17 S. Ameen, M. S. Akhtar, M. Nazim, E. B. Kim, M. K. Nazeeruddin and H. S. Shin, *Electrochimica Acta*, 2019, **319**, 885–894.
- 18 Z. Wu, S. Bai, J. Xiang, Z. Yuan, Y. Yang, W. Cui, X. Gao, Z. Liu, Y. Jin and B. Sun, *Nanoscale*, 2014, **6**, 10505–10510.

- 19 Y. G. Kim, K. C. Kwon, Q. van Le, K. Hong, H. W. Jang and S. Y. Kim, *Journal of Power Sources*, 2016, **319**, 1–8.
- 20 C. C. Chung, S. Narra, E. Jokar, H. P. Wu and E. Wei-Guang Diau, *Journal of Materials Chemistry A*, 2017, **5**, 13957–13965.
- 21 S. Feng, Y. Yang, M. Li, J. Wang, Z. Cheng, J. Li, G. Ji, G. Yin, F. Song, Z. Wang, J. Li and X. Gao, *ACS Applied Materials and Interfaces*, 2016, **8**, 14503–14512.
- 22 Ç. Şahin, H. Diker, D. Sygkridou, C. Varlikli and E. Stathatos, *Renewable Energy*, 2020, **146**, 1659–1666.
- 23 N. Arora, M. I. Dar, A. Hinderhofer, N. Pellet, F. Schreiber, S. M. Zakeeruddin and M. Grätzel, *Science*, 2017, **358**, 768–771.
- 24 G. S. Han, Y. H. Song, Y. U. Jin, J. W. Lee, N. G. Park, B. K. Kang, J. K. Lee, I. S. Cho, D. H. Yoon and H. S. Jung, *ACS Applied Materials and Interfaces*, 2015, **7**, 23521–23526.
- 25 M. M. Tavakoli, R. Tavakoli, Z. Nourbakhsh, A. Waleed, U. S. Virk and Z. Fan, *Advanced Materials Interfaces*, 2016, **3**, 1500790.
- 26 K. T. Cho, G. Grancini, Y. Lee, D. Konios, S. Paek, E. Kymakis and M. K. Nazeeruddin, *ChemSusChem*, 2016, **9**, 3040–3044.
- 27 N. Balis, A. A. Zaky, C. Athanasekou, A. M. Silva, E. Sakellis, M. Vasilopoulou, T. Stergiopoulos, A. G. Kontos and P. Falaras, *Journal of Photochemistry and Photobiology A: Chemistry*, 2020, **386**, 112141.
- 28 T. Umeyama, D. Matano, J. Baek, S. Gupta, S. Ito, V. Subramanian and H. Imahori, <https://doi.org/10.1246/cl.150651>, 2015, **44**, 1410–1412.
- 29 M. Hadadian, J. P. Correa-Baena, E. K. Goharshadi, A. Ummadisingu, J. Y. Seo, J. Luo, S. Gholipour, S. M. Zakeeruddin, M. Saliba, A. Abate, M. Grätzel and A. Hagfeldt, *Advanced Materials*, 2016, **28**, 8681–8686.
- 30 M. Li, W.-W. Zuo, Q. Wang, K.-L. Wang, M.-P. Zhuo, H. Köbler, C. E. Halbig, S. Eigler, Y.-G. Yang, X.-Y. Gao, Z.-K. Wang, Y. Li, A. Abate, M. Li, K. Wang, M. Zhuo, Z. Wang, W. Zuo, Q. Wang, H. Köbler, A. Abate, Y. F. Li, C. E. Halbig, S. Eigler, Y. Yang and X. Gao, *Advanced Energy Materials*, 2020, **10**, 1902653.
- 31 K. Yan, Z. Wei, J. Li, H. Chen, Y. Yi, X. Zheng, X. Long, Z. Wang, J. Wang, J. Xu and S. Yang, *Small*, 2015, **11**, 2269–2274.
- 32 J. S. Yeo, R. Kang, S. Lee, Y. J. Jeon, N. S. Myoung, C. L. Lee, D. Y. Kim, J. M. Yun, Y. H. Seo, S. S. Kim and S. I. Na, *Nano Energy*, 2015, **12**, 96–104.
- 33 H. Li, L. Tao, F. Huang, Q. Sun, X. Zhao, J. Han, Y. Shen and M. Wang, *ACS Applied Materials and Interfaces*, 2017, **9**, 38967–38976.
- 34 Q. Luo, Y. Zhang, C. Liu, J. Li, N. Wang and H. Lin, *Journal of Materials Chemistry A*, 2015, **3**, 15996–16004.
- 35 E. Jokar, Z. Y. Huang, S. Narra, C. Y. Wang, V. Kattoor, C. C. Chung and E. W. G. Diau, *Advanced Energy Materials*, 2018, **8**, 1701640.

- 36 M. Batmunkh, C. J. Shearer, M. J. Biggs and J. G. Shapter, *Journal of Materials Chemistry A*, 2016, **4**, 2605–2616.
- 37 J. Geng and T. Zeng, *Journal of the American Chemical Society*, 2006, **128**, 16827–16833.
- 38 J. P. Correa Baena, L. Steier, W. Tress, M. Saliba, S. Neutzner, T. Matsui, F. Giordano, T. J. Jacobsson, A. R. Srimath Kandada, S. M. Zakeeruddin, A. Petrozza, A. Abate, M. K. Nazeeruddin, M. Grätzel and A. Hagfeldt, *Energy & Environmental Science*, 2015, **8**, 2928–2934.
- 39 C. Sun and D. J. Searles, *Journal of Physical Chemistry C*, 2012, **116**, 26222–26226.
- 40 G. H. Kim, H. Jang, Y. J. Yoon, J. Jeong, S. Y. Park, B. Walker, I. Y. Jeon, Y. Jo, H. Yoon, M. Kim, J. B. Baek, D. S. Kim and J. Y. Kim, *Nano Letters*, 2017, **17**, 6385–6390.
- 41 X. Chang, W. Li, L. Zhu, H. Liu, H. Geng, S. Xiang, J. Liu and H. Chen, *ACS Applied Materials and Interfaces*, 2016, **8**, 33649–33655.
- 42 I. Jeon, S. Seo, Y. Sato, C. Delacou, A. Anisimov, K. Suenaga, E. I. Kauppinen, S. Maruyama and Y. Matsuo, *Journal of Physical Chemistry C*, 2017, **121**, 25743–25749.
- 43 K. T. Cho, G. Grancini, Y. Lee, D. Konios, S. Paek, E. Kymakis and M. K. Nazeeruddin, *ChemSusChem*, 2016, **9**, 3040–3044.
- 44 N. Balis, A. A. Zaky, C. Athanasekou, A. M. Silva, E. Sakellis, M. Vasilopoulou, T. Stergiopoulos, A. G. Kontos and P. Falaras, *Journal of Photochemistry and Photobiology A: Chemistry*, 2020, **386**, 112141.
- 45 M. Li, W.-W. Zuo, Q. Wang, K.-L. Wang, M.-P. Zhuo, H. Köbler, C. E. Halbig, S. Eigler, Y.-G. Yang, X.-Y. Gao, Z.-K. Wang, Y. Li, A. Abate, M. Li, K. Wang, M. Zhuo, Z. Wang, W. Zuo, Q. Wang, H. Köbler, A. Abate, Y. F. Li, C. E. Halbig, S. Eigler, Y. Yang and X. Gao, *Advanced Energy Materials*, 2020, **10**, 1902653.
- 46 H. Li, L. Tao, F. Huang, Q. Sun, X. Zhao, J. Han, Y. Shen and M. Wang, *ACS Applied Materials and Interfaces*, 2017, **9**, 38967–38976.
- 47 Q. Luo, Y. Zhang, C. Liu, J. Li, N. Wang and H. Lin, *Journal of Materials Chemistry A*, 2015, **3**, 15996–16004.
- 48 S. Ameen, M. S. Akhtar, M. Nazim, E. B. Kim, M. K. Nazeeruddin and H. S. Shin, *Electrochimica Acta*, 2019, **319**, 885–894.
- 49 Y. G. Kim, K. C. Kwon, Q. van Le, K. Hong, H. W. Jang and S. Y. Kim, *Journal of Power Sources*, 2016, **319**, 1–8.
- 50 E. L. Lim, C. C. Yap, M. H. H. Jumali, M. A. M. Teridi and C. H. Teh, *Nano-Micro Letters*, 2018, **10**, 1–12.
- 51 Y. Xiao, C. Wang, K. K. Kondamareddy, P. Liu, F. Qi, H. Zhang, S. Guo and X. Z. Zhao, *Journal of Power Sources*, 2019, **422**, 138–144.
- 52 Y. Sheng, Y. Hu, A. Mei, P. Jiang, X. Hou, M. Duan, L. Hong, Y. Guan, Y. Rong, Y. Xiong and H. Han, *Journal of Materials Chemistry A*, 2016, **4**, 16731–16736.

- 53 H. Zhang, H. Wang, S. T. Williams, D. Xiong, W. Zhang, C. C. Chueh, W. Chen and A. K. Y. Jen, *Advanced Materials*, 2017, **29**, 1606608.
- 54 J. Liu, Q. Zhou, N. K. Thein, L. Tian, D. Jia, E. M. J. Johansson and X. Zhang, *Journal of Materials Chemistry A*, 2019, **7**, 13777–13786.
- 55 Z. Wei, K. Yan, H. Chen, Y. Yi, T. Zhang, X. Long, J. Li, L. Zhang, J. Wang and S. Yang, *Energy & Environmental Science*, 2014, **7**, 3326–3333.
- 56 H. Chen, X. Zheng, Q. Li, Y. Yang, S. Xiao, C. Hu, Y. Bai, T. Zhang, K. S. Wong and S. Yang, *Journal of Materials Chemistry A*, 2016, **4**, 12897–12912.
- 57 H. Chen and S. Yang, *Advanced Materials*, 2017, **29**, 1603994.
- 58 T. Umeyama, D. Matano, S. Shibata, J. Baek, S. Ito and H. Imahori, *ECS Journal of Solid State Science and Technology*, 2017, **6**, M3078–M3083.
- 59 Q. Q. Ye, Z. K. Wang, M. Li, C. C. Zhang, K. H. Hu and L. S. Liao, *ACS Energy Letters*, 2018, **3**, 875–882.
- 60 Y. Wang, T. Wu, J. Barbaud, W. Kong, D. Cui, H. Chen, X. Yang and L. Han, *Science*, 2019, **365**, 687–691.
- 61 R. Wang, M. Mujahid, Y. Duan, Z. K. Wang, J. Xue and Y. Yang, *Advanced Functional Materials*, 2019, **29**, 1808843.
- 62 S. Y. Luchkin, A. F. Akbulatov, L. A. Frolova, M. P. Griffin, A. Dolocan, R. Gearba, D. A. V. Bout, P. A. Troshin and K. J. Stevenson, *ACS Applied Materials and Interfaces*, 2017, **9**, 33478–33483.
- 63 S. Bae, S. Kim, S. W. Lee, K. J. Cho, S. Park, S. Lee, Y. Kang, H. S. Lee and D. Kim, *Journal of Physical Chemistry Letters*, 2016, **7**, 3091–3096.
- 64 M. Batmunkh, T. J. Macdonald, C. J. Shearer, M. Bat-Erdene, Y. Wang, M. J. Biggs, I. P. Parkin, T. Nann, J. G. Shapter, M. Batmunkh, M. J. Biggs, C. J. Shearer, M. Bat-Erdene, J. G. Shapter, T. J. Macdonald, I. P. Parkin, Y. Wang and T. Nann, *Advanced Science*, 2017, **4**, 1600504.
- 65 M. Batmunkh, C. J. Shearer, M. Bat-Erdene, M. J. Biggs and J. G. Shapter, *ACS Applied Materials and Interfaces*, 2017, **9**, 19945–19954.
- 66 C. Tian, K. Kochiss, E. Castro, G. Betancourt-Solis, H. Han and L. Echegoyen, *Journal of Materials Chemistry A*, 2017, **5**, 7326–7332.
- 67 T. Mahmoudi, Y. Wang and Y. B. Hahn, *Advanced Energy Materials*, 2020, **10**, 1903369.
- 68 C. Tian, E. Castro, G. Betancourt-Solis, Z. Nan, O. Fernandez-Delgado, S. Jankuru and L. Echegoyen, *New Journal of Chemistry*, 2018, **42**, 2896–2902.
- 69 G. Namkoong, A. A. Mamun and T. T. Ava, *Organic Electronics*, 2018, **56**, 163–169.
- 70 J. P. Correa-Baena, M. Anaya, G. Lozano, W. Tress, K. Domanski, M. Saliba, T. Matsui, T. J. Jacobsson, M. E. Calvo, A. Abate, M. Grätzel, H. Míguez and A. Hagfeldt, *Advanced Materials*, 2016, **28**, 5031–5037.

- 71 J. v. Milić, N. Arora, M. I. Dar, S. M. Zakeeruddin and M. Grätzel, *Advanced Materials Interfaces*, 2018, **5**, 1800416.
- 72 C. Wu, K. Wang, Y. Yan, D. Yang, Y. Jiang, B. Chi, J. Liu, A. R. Esker, J. Rowe, A. J. Morris, M. Sanghadasa and S. Priya, *Advanced Functional Materials*, 2019, **29**, 1804419.
- 73 S. S. Li, K. H. Tu, C. C. Lin, C. W. Chen and M. Chhowalla, *ACS Nano*, 2010, **4**, 3169–3174.
- 74 W. Chen, Y. Wu, J. Fan, A. B. Djurišić, F. Liu, H. W. Tam, A. Ng, C. Surya, W. K. Chan, D. Wang and Z. B. He, *Advanced Energy Materials*, 2018, **8**, 1703519.
- 75 J. Cao, Y. M. Liu, X. Jing, J. Yin, J. Li, B. Xu, Y. Z. Tan and N. Zheng, *Journal of the American Chemical Society*, 2015, **137**, 10914–10917.
- 76 R. Ishikawa, S. Watanabe, S. Yamazaki, T. Oya and N. Tsuboi, *ACS Applied Energy Materials*, 2019, **2**, 171–175.
- 77 M. O. Reese, S. A. Gevorgyan, M. Jørgensen, E. Bundgaard, S. R. Kurtz, D. S. Ginley, D. C. Olson, M. T. Lloyd, P. Morvillo, E. A. Katz, A. Elschner, O. Haillant, T. R. Currier, V. Shrotriya, M. Hermenau, M. Riede, K. R. Kirov, G. Trimmel, T. Rath, O. Inganäs, F. Zhang, M. Andersson, K. Tvingstedt, M. Lira-Cantu, D. Laird, C. McGuinness, S. Gowrisanker, M. Pannone, M. Xiao, J. Hauch, R. Steim, D. M. Delongchamp, R. Rösch, H. Hoppe, N. Espinosa, A. Urbina, G. Yaman-Uzunoglu, J. B. Bonekamp, A. J. J. M. van Breemen, C. Girotto, E. Voroshazi and F. C. Krebs, *Solar Energy Materials and Solar Cells*, 2011, **95**, 1253–1267.
- 78 A. K. Baranwal, S. Kanaya, T. A. N. Peiris, G. Mizuta, T. Nishina, H. Kanda, T. Miyasaka, H. Segawa and S. Ito, *ChemSusChem*, 2016, **9**, 2604–2608.
- 79 F. Zhang, X. Yang, M. Cheng, W. Wang and L. Sun, *Nano Energy*, 2016, **20**, 108–116.
- 80 S. Gholipour, J. P. Correa-Baena, K. Domanski, T. Matsui, L. Steier, F. Giordano, F. Tajabadi, W. Tress, M. Saliba, A. Abate, A. Morteza Ali, N. Taghavinia, M. Grätzel and A. Hagfeldt, *Advanced Energy Materials*, 2016, **6**, 1601116.
- 81 X. Xu, Z. Liu, Z. Zuo, M. Zhang, Z. Zhao, Y. Shen, H. Zhou, Q. Chen, Y. Yang and M. Wang, *Nano Letters*, 2015, **15**, 2402–2408.
- 82 R. Dileep, G. Kesavan, V. Reddy, M. K. Rajbhar, S. Shanmugasundaram, E. Ramasamy and G. Veerappan, *Solar Energy*, 2019, **187**, 261–268.
- 83 X. Chang, W. Li, L. Zhu, H. Liu, H. Geng, S. Xiang, J. Liu and H. Chen, *ACS Applied Materials and Interfaces*, 2016, **8**, 33649–33655.
- 84 J. Geng and T. Zeng, *Journal of the American Chemical Society*, 2006, **128**, 16827–16833.
- 85 G. Grancini, C. Roldán-Carmona, I. Zimmermann, E. Mosconi, X. Lee, D. Martineau, S. Narbey, F. Oswald, F. de Angelis, M. Graetzel and M. K. Nazeeruddin, *Nature Communications 2017 8:1*, 2017, **8**, 1–8.
- 86 X. Chang, W. Li, L. Zhu, H. Liu, H. Geng, S. Xiang, J. Liu and H. Chen, *ACS Applied Materials and Interfaces*, 2016, **8**, 33649–33655.
- 87 K. Cao, J. Cui, H. Zhang, H. Li, J. Song, Y. Shen, Y. Cheng and M. Wang, *Journal of Materials Chemistry A*, 2015, **3**, 9116–9122.



- 88 Q. Luo, H. Ma, Y. Zhang, X. Yin, Z. B. Yao, N. Wang, J. Li, S. Fan, K. Jiang and H. Lin, *Journal of Materials Chemistry A*, 2016, **4**, 5569–5577.
- 89 P. Liu, Y. Gong, Y. Xiao, M. Su, S. Kong, F. Qi, H. Zhang, S. Wang, X. Sun, C. Wang and X. Z. Zhao, *Chemical Communications*, 2018, **55**, 218–221.
- 90 B. Zong, W. Fu, Z. an Guo, S. Wang, L. Huang, B. Zhang, H. Bala, J. Cao, X. Wang, G. Sun and Z. Zhang, *Journal of Colloid and Interface Science*, 2019, **540**, 315–321.
- 91 X. Zhang, Y. Zhou, Y. Li, J. Sun, X. Lu, X. Gao, J. Gao, L. Shui, S. Wu and J. M. Liu, *Journal of Materials Chemistry C*, 2019, **7**, 3852–3861.
- 92 S. Wang, H. Liu, H. Bala, B. Zong, L. Huang, Z. an Guo, W. Fu, B. Zhang, G. Sun, J. Cao and Z. Zhang, *Electrochimica Acta*, 2020, **335**, 135686.
